# Supplementary material for: Phase 4 Multinational Multicenter Retrospective and Prospective Real-World Study of Nivolumab in Recurrent and Metastatic Squamous Cell Carcinoma of the Head and Neck
Source: MDPI journal article supplement (doi:10.3390/cancers15143552), 2023-07-09
Supplement: s1 [file s1]

Table S1: Subsequent Anti-cancer Therapy Following Nivolumab in VOLUME Patients (N=447)

|                         | N (%)      |
|-------------------------|------------|
| Any anti-cancer therapy | 140 (31.3) |
| Any surgery             | 6 (4.3)    |
| Any radiotherapy        | 47 (33.6)  |
| Any cytotoxic drugs     | 104 (74.3) |
| Paclitaxel*             | 64 (61.5)  |
| Carboplatin*            | 26 (25.0)  |
| Cetuximab*              | 24 (23.1)  |
| Methotrexate*           | 20 (19.2)  |
| Docetaxel*              | 18 (17.3)  |
| 5-fluorouracil*         | 8 (7.7)    |
| Cisplatin*              | 7 (6.7)    |
| Other*                  | 23 (22.1)  |

\* Only assessed for patients with at least one cytotoxic drug

Percentages based on the number of patients with at least one post-nivolumab treatment and non-missing data.
