# Supplementary material for: Phase 4 Multinational Multicenter Retrospective and Prospective Real-World Study of Nivolumab in Recurrent and Metastatic Squamous Cell Carcinoma of the Head and Neck
Source: MDPI journal article supplement (doi:10.3390/cancers15143552), 2023-07-09
Supplement: s1 [file s1]

Table S2: Overall Survival by Age Group (N=447)

|                                | ≤65 years old     | >65 years old     |
|--------------------------------|-------------------|-------------------|
| Number of patients             | 263               | 184               |
| Time to event (months) [a]     |                   |                   |
| Median (95% CI)                | 9.6 (8.2;10.8)    | 8.6 (7.3;13.7)    |
| Range (with censored patients) | 0.0-44.8          | 0.2-46.5          |
| Event-free rate at             |                   |                   |
| 6 months (95% CI)              | 63.3 (57.0; 68.9) | 64.3 (56.7; 70.9) |
| 9 months (95% CI)              | 52.0 (45.5; 58.0) | 49.7 (42.0; 57.0) |
| 1 year (95% CI)                | 39.0 (32.7; 45.2) | 44.6 (36.9; 51.9) |
| 2 years (95% CI)               | 24.6 (18.9; 30.7) | 24.1 (16.9; 32.0) |
| 3 years (95% CI)               | 18.6 (12.4; 25.8) | 16.3 (9.0; 25.4)  |

CI: Confidence interval

[a] Kaplan-Meier estimations
