# Supplementary figures and images for: Phase 4 Multinational Multicenter Retrospective and Prospective Real-World Study of Nivolumab in Recurrent and Metastatic Squamous Cell Carcinoma of the Head and Neck
Source: MDPI journal article supplement (doi:10.3390/cancers15143552), 2023-07-09

1

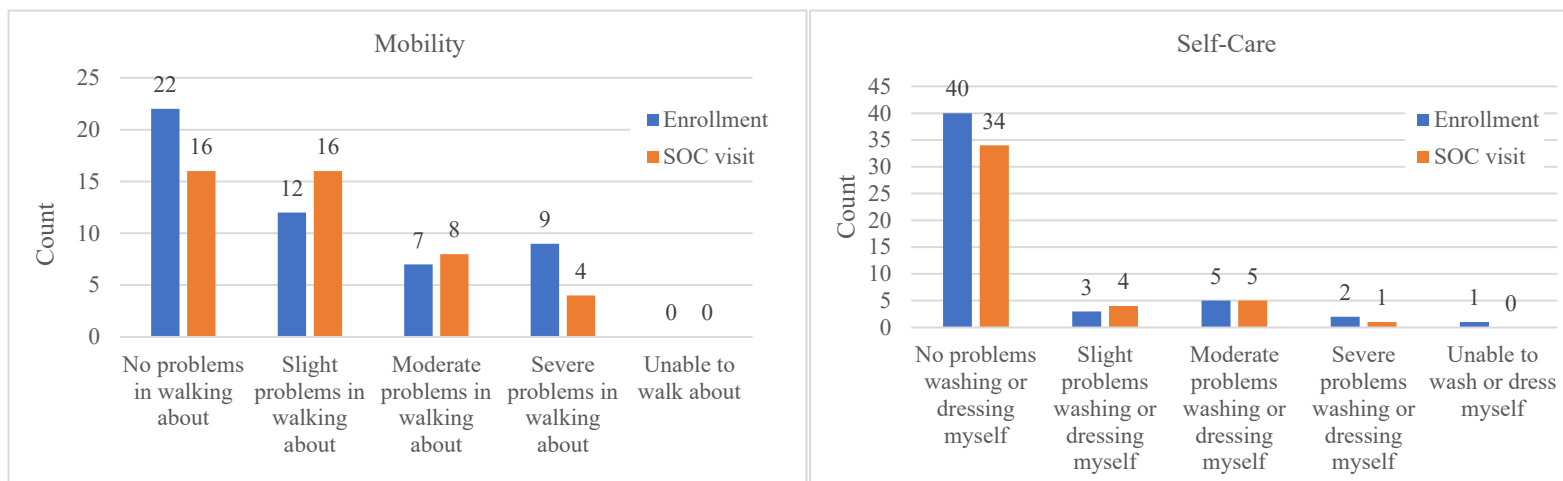

2

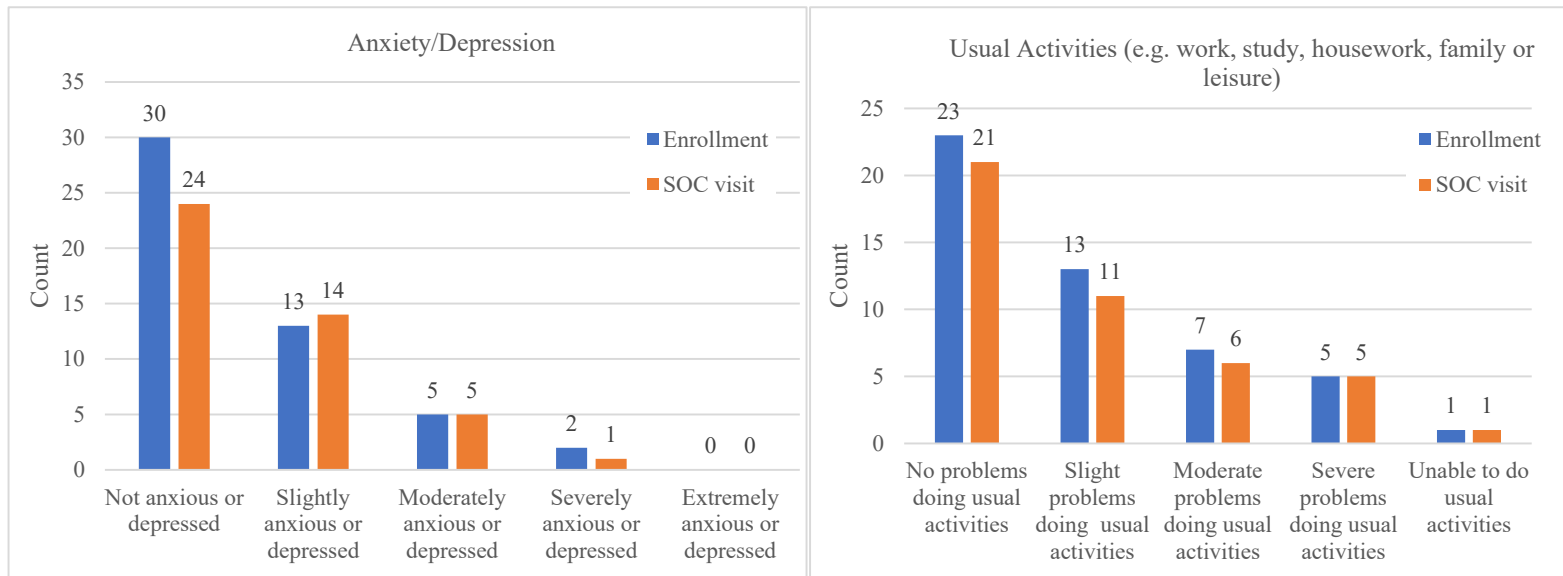

3

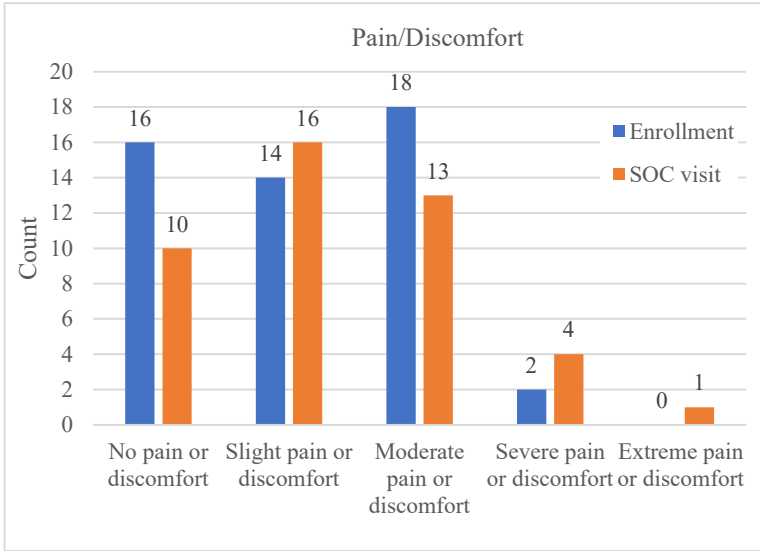

SOC: Standard of Care

Figure S1: EQ-5D-5L Dimension Bar Charts, by Visit Type

4  
5  
6

Supplement: s1 [file s1]
